# Supplementary material for: Enzymatic manipulation of a DNA-mediated ensemble for sensitive fluorescence detection of glucose
Source: Royal Society of Chemistry journal article supplement (doi:10.1039/c6ra05701b), 2016-01-01
Supplement: c6ra05701b1.pdf [file c6ra05701b1.pdf]

### Supporting Information

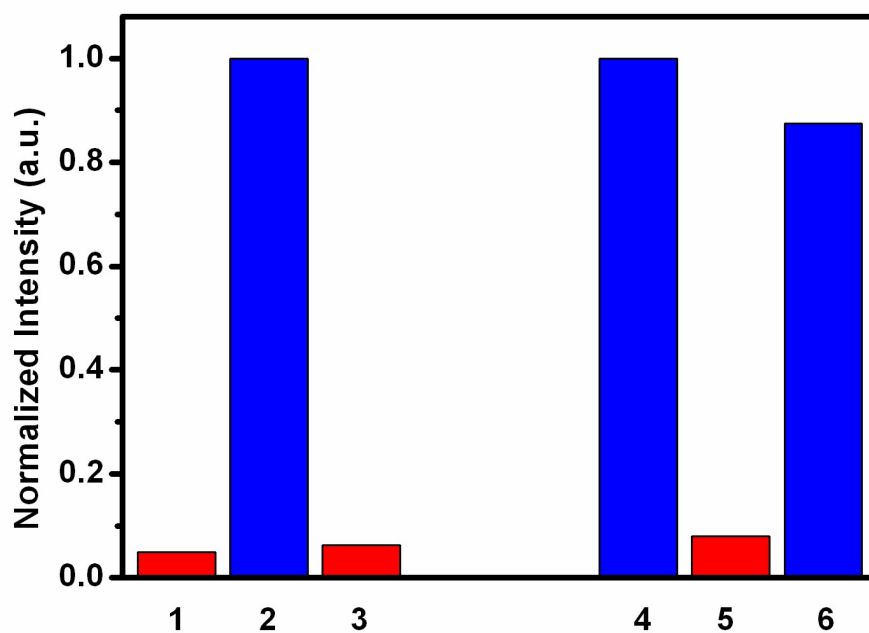

Figure S1. Fluorescence emission response profiles of solutions containing 1) ligand 1, 2) ligand 1/ssDNA/Fe<sup>2+</sup>, 3) ligand 1/ssDNA/Fe<sup>2+</sup>/H<sub>2</sub>O<sub>2</sub>, and 4) ligand 2, 5) ligand 2/ssDNA/Fe<sup>2+</sup>, 6) ligand 2/ssDNA/Fe<sup>2+</sup>/H<sub>2</sub>O<sub>2</sub>. [ligand 1] = 0.1 μM, [ligand 1] = 1 μM, [DNA] = 0.15 μM, [H<sub>2</sub>O<sub>2</sub>] = 0.2 mM, [Fe<sup>2+</sup>] = 30 μM.

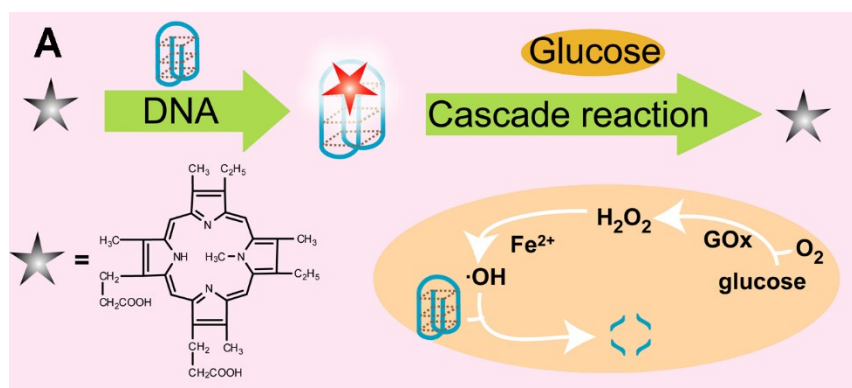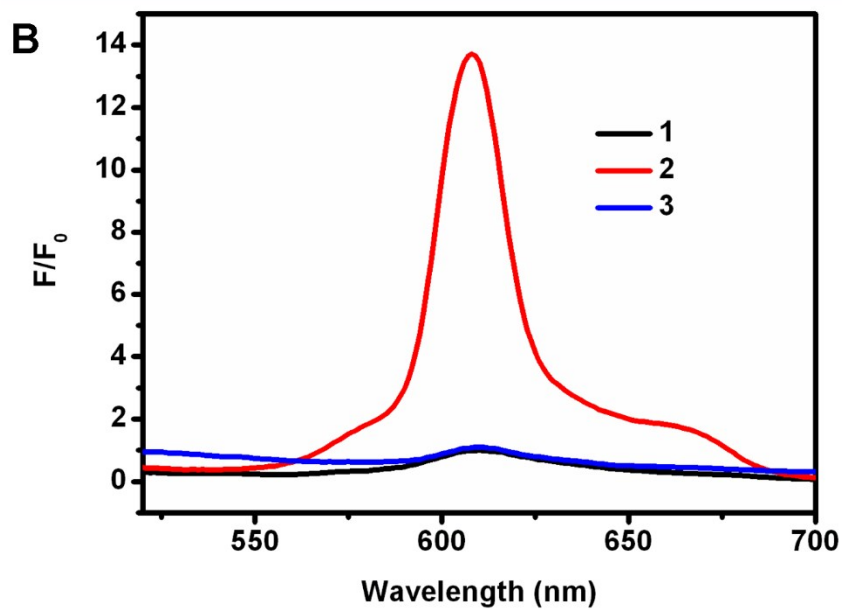

Figure S2. A) A turn-off response pattern of glucose using G-quadruplex and N-methyl mesoporphyrin IX dye (NMM). Fluorescence spectra of solutions containing 1) NMM, 2) NMM/G-quadruplex, 3) NMM/G-quadruplex /Fe<sup>2+</sup>/glucose/GOx.

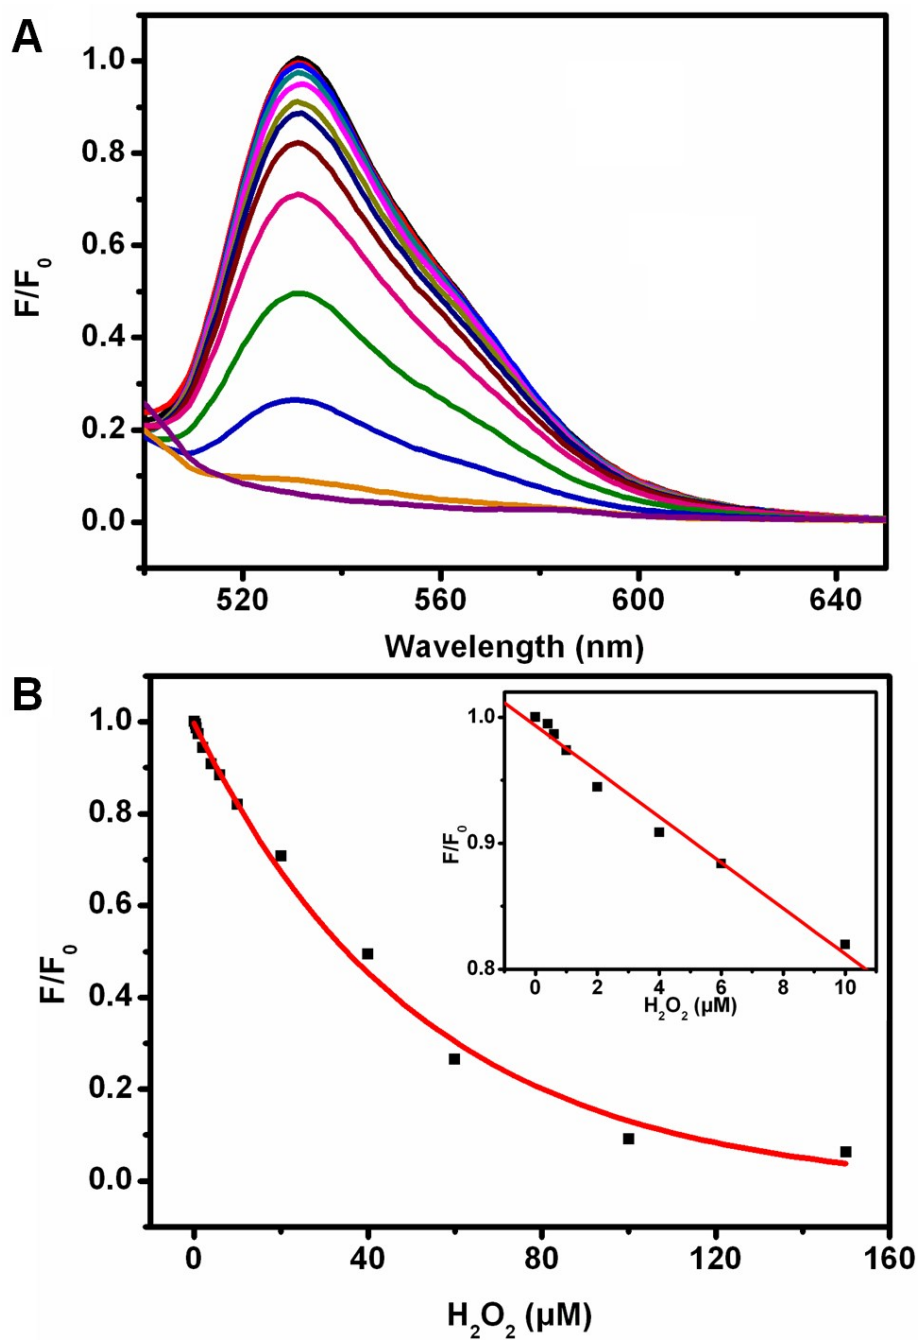

Figure S3. (A) Fluorescence emission spectra of the ligand 1 and ssDNA complex in the presence of increasing  $H_2O_2$  concentrations (0–160  $\mu M$ ). (B) Plots of the fluorescence intensity of the ligand 1-ssDNA complex at 530 nm as a function of the  $H_2O_2$  concentration (0–160  $\mu M$ ). [ligand 1] = 0.1  $\mu M$ , [DNA] = 0.15  $\mu M$ ,  $[Fe^{2+}] = 30 \mu M$  Inset: the linear plot.

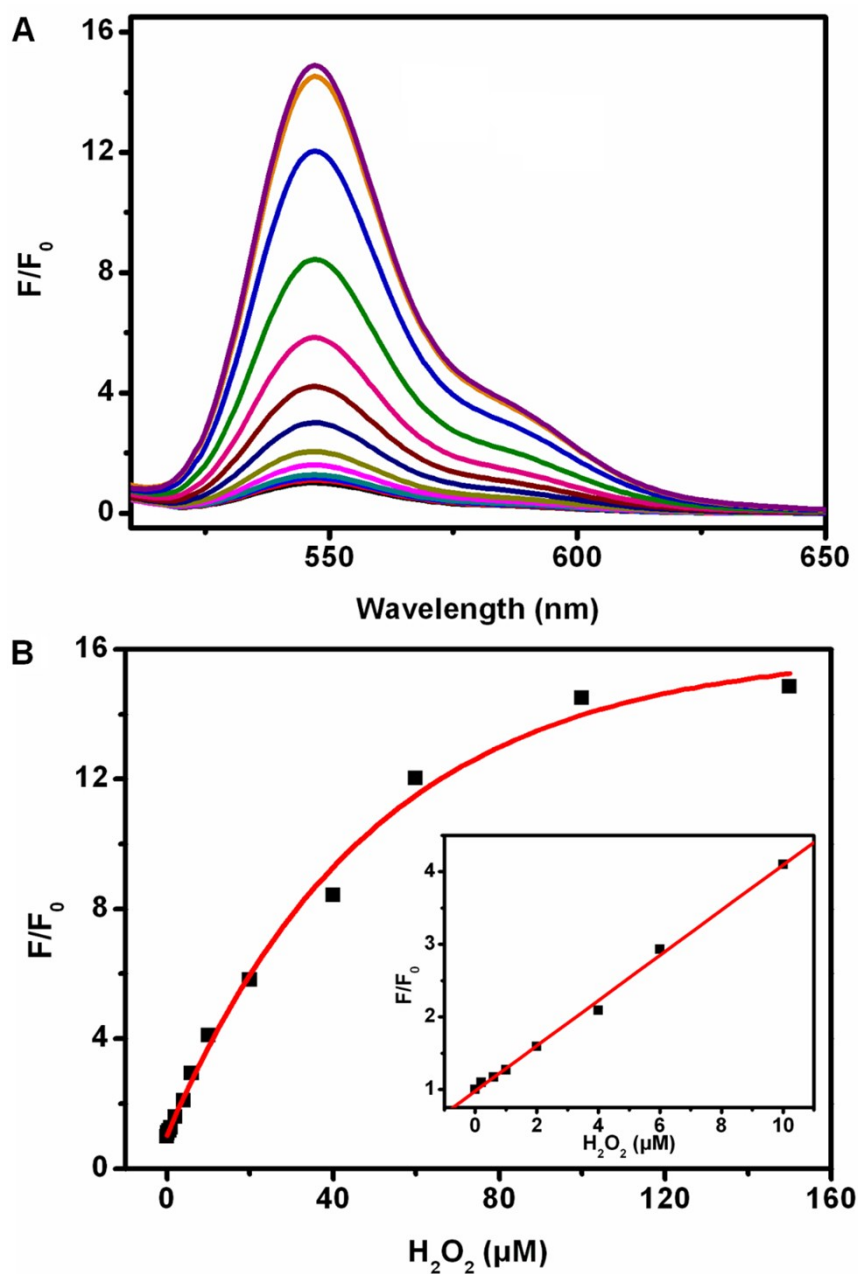

Figure S4. (A) Fluorescence emission spectra of the ligand 2 and ssDNA complex in the presence of increasing  $H_2O_2$  concentrations (0–160  $\mu M$ ). (B) Plots of the fluorescence intensity of the ligand 2-ssDNA complex at 548 nm as a function of the  $H_2O_2$  concentration (0–160  $\mu M$ ). [ligand 2] = 1  $\mu M$ , [DNA] = 0.15  $\mu M$ , [ $Fe^{2+}$ ] = 30  $\mu M$ . Inset: the linear plot.
